# Supplementary material
Source: Atypon-hosted journal article supplement (https://mail.jpma.org.pk/PdfDownloadsupplements/285)
Supplement: 285 [file 285]

## Prevention of Gestational Diabetes Mellitus (GDM)

Sanjay Kalra,<sup>1</sup> Yashdeep Gupta,<sup>2</sup> Arun Kumar<sup>3</sup>

### Abstract

Prevention of Gestational diabetes mellitus holds the key to prevention of the diabetes and metabolic syndrome epidemic sweeping the world. This review discusses prevention of gestational diabetes and provides a scientific framework for the study of this topic. It classifies prevention in various ways, and suggests strategies which fit the different levels of prevention of gestational diabetes. The review also cites recent evidence and best practices to support the feasibility of prevention of gestational diabetes.

**Keywords:** Primary prevention, Primordial prevention, Secondary prevention, Tertiary prevention, Quaternary prevention, Lifestyle modification.

### Introduction

The Dhaka Declaration (2015) highlights gestational diabetes mellitus (GDM) management as a challenge, as well as opportunity, for both public health and clinical medicine.<sup>1</sup> GDM is a form of pre-diabetes, which punches far beyond its weight, causing acute, chronic, and trans-generational impact. Similar to rate limiting step in chemistry, which may be hastened with enzymes, or delayed by inhibitors, GDM can be worsened by mismanagement, or prevented by appropriate measures. Action at this level will have downstream consequences, not only for the woman in question, but for her unborn offspring, and for the community she lives in. Hence, prevention of GDM is of paramount importance.

### Levels of Prevention

Prevention can be classified according to levels (primordial,

primary, secondary, tertiary and quaternary);<sup>2,3</sup> targets (all girls and women, women in preconception, antenatal, postnatal, and inter-conception phases); and intervention (non-pharmacological, pharmacological) (Tables-1, 2).

### Scope of Prevention

Primordial prevention refers to the avoidance of risk factors of a particular condition. Primordial GDM prevention includes maintenance of weight, appropriate nutrition, physical activity and lifestyle for all girls and all women in the reproductive age group or even during childhood. This attenuates the effect of modifiable risk factors on insulin sensitivity, and on the pathogenesis of GDM. Primary prevention implies the correction of risk factors that are already in play, but which have not yet led to the actual disease. From a GDM perspective, primary prevention focuses on healthy lifestyle, including medical nutrition therapy and exercise, in high risk antenatal women, to prevent GDM onset. Breast feeding can be classified as primordial prevention, when applied to all post-partum women, and as a primary prevention strategy if encouraged in women with history of GDM.

Secondary prevention of any medical condition, including GDM, encompasses screening, early diagnosis and treatment, whether non- pharmacological or drug-based. The aim is to arrest the natural history of the disease at an early stage, and prevent medical, obstetric, and paediatric complications. Targeting antenatal women with poor antenatal care- seeking behaviour, to achieve behaviour change and seek timely antenatal care, will also be included in secondary prevention.

**Table-1: Classification of prevention of GDM: levels, targets.**

| Level      | Life phase                  | Target                                          | Activity                                                       |
|------------|-----------------------------|-------------------------------------------------|----------------------------------------------------------------|
| Primordial | Pre puberty / puberty       | All young girls                                 | Prevention of risk factors                                     |
| Primary    | Preconception               | All adult women                                 | Correction of risk factors                                     |
| Secondary  | Early antenatal             | All women with GDM                              | Early screening, diagnosis; lifestyle modification; management |
| Tertiary   | Antenatal/ Inter conception | All women with complicated GDM; their offspring | Medical, obstetric, neonatal management                        |
| Quaternary | All                         | All women at risk of/with history of GDM        | Avoid over diagnosis, over treatment                           |

<sup>1</sup>Department of Endocrinology, Bharti Hospital, Karnal, <sup>2</sup>Department of Endocrinology, AIIMS, New Delhi, <sup>3</sup>Department of Community Medicine, Shaheed Hassan Khan Mewati Government Medical College, Nalhar, Mewat, India.

**Correspondence:** Sanjay Kalra. Email: brideknl@gmail.com

Tertiary prevention refers to management of complications encountered in GDM, so as to minimize their impact on fetomaternal and neonatal health. All medical and obstetric management in the antenatal, postnatal and interconception period, as well as neonatal

and paediatric management of the offspring, is part of tertiary prevention.

One should be aware of quaternary prevention, which describes the need to avoid over-diagnosis, over-labelling, and over-treatment of any medical condition. The psychosocial impact caused by a label of 'diabetes' in a young women, especially in Asia,<sup>4</sup> underscores the need to practice quaternary prevention in GDM. This is done by following validated means of screening and diagnosis. Quaternary prevention also encompasses the need to follow simple [yet sensitive] means of screening and diagnosis, as well as avoid over-treatment. For example, unnecessarily treating an antenatal woman with mild uncomplicated dysglycaemia, when she is diagnosed with GDM a few days or weeks prior to delivery, may be projected as a case fit for quaternary prevention.

### Lifestyle Modification

Data is emerging regarding the role of physical activity, medical nutrition therapy, and weight management, during inter-conception, pre-conception, antenatal, and postpartum phases.

### Non-Pharmacological Prevention

The Finnish Gestational Diabetes Prevention trial (REDIEL) enrolled 293 women with a history of GDM and/or a pre-pregnancy BMI of  $\geq 30\text{kg/m}^2$ , at  $<20$  weeks gestation. These women were randomized to a control group, which received standard antenatal care, or an intervention group, which also received individualized counseling on diet, physical activity and weight control.<sup>5</sup>

The incidence of GDM, as diagnosed by a 75g, 2 hour oral glucose tolerance test conducted at 24-28 weeks gestation, was 21.6% in the control and 13.9% in the intervention group ( $p=0.044$ ) (39% difference) Gestational weight gain was lower in the intervention group ( $-0.58\text{kg}$ ;  $P=0.037$ ), whose subjects also reported improved quality of diet and increased physical activity during leisure time.

Similar findings were reported from a Chinese study,<sup>6</sup> which sampled 74 women with a BMI.  $24\text{kg/m}^2$  at convenience. While both interventional and control groups received standard antenatal care and exercise, dietary and weight counseling at weeks 8-12, the intervention group also received counseling session every month during the 2nd trimester, and weekly follow up on telephone or via e-mail. These subjects had a much lower incidence of GDM and weight gain at the end of the 2nd trimester (28.1% vs 55.9%,  $p=0.023$  and  $6.86 \pm 3.84\text{kg}$ ,  $p=0.000$ ) than the control group.

The role of energy, nutrients, foods and dietary patterns in the development of GDM has been the subject of many studies. A detailed systematic review suggests that GDM risk is associated with higher fat, cholesterol, hence iron, red processed meat and egg consumption. A diet rich in fruit, vegetables, whole grains and fish, and low in red and processed meat, refined grains and high-fat dairy products is beneficial.<sup>7</sup> A prospective cohort study, including 15632 women from the Nurses' Health Study II (1991-2001) reports that women who consumed more potatoes before pregnancy had higher rates of GDM.<sup>8</sup> Substitution of 2 servings a week of potatoes with other vegetables, legumes and whole grain foods led to a 9-12% lower risk of GDM. While the authors did not infer a causal risk, this study underscores the effectiveness of dietary modification as a preventive strategy.

On the other hand, the GI baby 3 Study, a randomized controlled trial, found no benefit of a low glycaemic index diet on pregnancy outcomes, including incidence of GDM, in women at high risk of the condition.<sup>9</sup>

Physical activity is another aspect of lifestyle which has been supported as a means of preventing GDM. A recent prospective cohort study showed that participation in vigorous intensity exercise helped reduced the odds of excessive gestational weight gain by 54% in women with recently diagnosed GDM. No such association was noted for moderate intensity exercise.<sup>10</sup>

Stress is a (partly) modifiable component of lifestyle as well. A cross-sectional, prospective study included 146 women who were exposed to the Hurricane Katrina, which hit Louisiana, during or just before pregnancy. Stress perception and use of denial coping style was found to significantly predispose to GDM (adjusted odds ratio 1.13,  $p=0.03$  and 2.25,  $p=0.02$  respectively).<sup>11</sup>

### Pharmacological Prevention

Pharmacological preventive strategies, including the Chinese traditional medication Zuogui Wan, and myo-inositol, have been used in GDM.<sup>12,13</sup> However, data in support of their use is limited.

Drugs are best utilized in tertiary prevention. While the drug of choice is insulin, metformin and glibenclamide have also been accepted for use in certain situations. The bio-psycho social model of health has been used to create pragmatic indications for the use of metformin.<sup>14</sup> These include GDM detected during the late third trimester, poor adherence to insulin, poor self-management skills for injectable therapy, GDM refractory to high dose insulin, unwanted weight gain with insulin, and psychological or social resistance to insulin.

## Postpartum Prevention

Postpartum follow up is a key element of GDM management step for prevention of further episode of GDM, as well as future diabetes.<sup>15</sup> The components of GDM postpartum follow up are encapsulated in the mnemonic ABCDE (Assessment Breast feeding Contraception, Diet and Exercise).<sup>16</sup> Breastfeeding, as a preventive strategy for GDM and diabetes, has been reviewed earlier in the JPMA.<sup>17</sup>

## Barriers and Solutions

Universal or high-risk screening strategies, followed by appropriate treatment, are being used as secondary preventive interventions, to achieve safe glycaemic control and prevent complications in GDM. Women with GDM are being followed up post-delivery, to ensure accurate risk stratification, and appropriate lifestyle/pharmacological interventions. The efficacy of such follow up programmes can be improved if they are made concordant with existing child health schemes

## Best Practices from South Asia

Major strides have taken place in the prevention and management of GDM and its associated complications. In Bangladesh, qazis deliver health education related to GDM prevention while solemnizing marriages. In India, gynaecologists offer preconception education material printed on 'shagun' envelopes in which gifts are given to newlywed couples.

Such best practices need to be replicated across the world, to help arrest GDM, and the diabetes pandemic. The current supplement of JPMA, too, is a means of achieving this goal.

## References

1. Mahtab H, Pathan MF, Ahmed T, Bajaj S, Sahay R, Raza SA, et al. The Dhaka declaration 2015. *Indian J Endocrinol Metab* 2015; 19: 441-2.
2. Park K. Park's textbook of preventive and social medicine. 23rd ed. Jabalpur: Banarsidas Bhanot Publishers; 2015: 41-2.
3. Jamouille M, Roland M. Quaternary prevention. Presented at the meeting of the Wonca Classification Committee. Hong Kong, 1995.
4. Bajaj S, Jawad F, Islam N, Mahtab H, Bhattarai J, Shrestha D, et al. South Asian women with diabetes: psychosocial challenges and management: consensus statement. *Indian J Endocrinol Metab* 2013; 17: 548-62.
5. Koivusalo SB, Rönö K, Klemetti MM, Roine RP, Lindström J, Erkkola M, et al. Gestational diabetes mellitus can be prevented by lifestyle intervention: the Finnish gestational diabetes prevention study (RADIEL): a randomized controlled trial. *Diabetes care*. 2016; 39: 24-30.
6. Sun Y, Zhao H. The effectiveness of lifestyle intervention in early pregnancy to prevent gestational diabetes mellitus in Chinese overweight and obese women: A quasi-experimental study. *Appl Nurs Res* 2016; 30: 125-30.
7. Schoenaker DA, Mishra GD, Callaway LK, Soedamah-Muthu SS. The role of energy, nutrients, foods, and dietary patterns in the development of gestational diabetes mellitus: a systematic review of observational studies. *Diabetes Care* 2016; 39: 16-23.
8. Bao W, Tobias DK, Hu FB, Chavarro JE, Zhang C. Pre-pregnancy potato consumption and risk of gestational diabetes mellitus: prospective cohort study. *BMJ* 2016; 352:h6898.doi: <http://dx.doi.org/10.1136/bmj.h6898>.
9. Markovic TP, Muirhead R, Overs S, Ross GP, Louie JC, Kizirian N, et al. Randomized controlled trial investigating the effects of a low-glycemic index diet on pregnancy outcomes in women at high risk of gestational diabetes mellitus: the GI baby 3 study. *Diabetes care* 2016; 39: 31-8.
10. Ehrlich SF, Sternfeld B, Krefman AE, Hedderson MM, Brown SD, Mevi A, Chasan-Taber L, Quesenberry Jr CP, Ferrara A. Moderate and vigorous intensity exerciseduring pregnancy and gestational weight gain in women with gestational diabetes. *Matern Child Health J* 2016; 1-11. In Press.
11. Oni O, Harville E, Xiong X, Buekens P. Relationships among stress coping styles and pregnancy complications among women exposed to hurricane Katrina. *J Obstet Gynecol Neonatal Nurs* 2015; 44: 256-67.
12. Wang Y, Feng Q, Niu X, Xu K, Wang Y, Wang J, et al. The preventive effect of Zuogui Wan on offspring rats' impaired glucose tolerance whose mothers had gestational diabetes mellitus. *Evid Based Complement Alternat Med* 2016; 2016: 9417362.doi: [10.1155/2016/9417362](https://doi.org/10.1155/2016/9417362).
13. D'Anna R, Di Benedetto A, Scilipoti A, Santamaria A, Interdonato ML, Petrella E, et al. Myo-inositol supplementation for prevention of gestational diabetes in obese pregnant women: a randomized controlled trial. *Obstet Gynecol* 2015; 126: 310-5.
14. Kalra B, Gupta Y. Pragmatic use of metformin in pregnancy based on bio psychosocial model of health. *Indian J Endocr Metab* 2013; 17: 1133-5.
15. Guo J, Chen JL, Whittemore R, Whitaker E. Postpartum lifestyle interventions to prevent type 2 diabetes among women with history of gestational diabetes: a systematic review of randomized clinical trials. *J Womens Health (Larchmt)* 2016; 25: 38-49.
16. Kalra B, Gupta Y, Kalra S. Gestational diabetes mellitus (GDM) follow up: as simple as ABCDE. *Diabetes Res Clin Pract* 2015; 2: e5-6.
17. Kalra B, Gupta Y, Kalra S. Breast feeding: preventive therapy for type 2 diabetes. *J Pak Med Assoc* 2015; 65: 1134-6.
